# Supplementary material for: Complete Genome Report of a Hydrocarbon-Degrading Sphingobium yanoikuyae S72
Source: MDPI journal article supplement (doi:10.3390/app12126201), 2022-06-18
Supplement: s1 [file s1]

Archive with 2 entries (2 files):
- Supplementary figure.pdf
- Supplementary table .pdf
