# Supplementary material for: Complete Genome Report of a Hydrocarbon-Degrading Sphingobium yanoikuyae S72
Source: MDPI journal article supplement (doi:10.3390/app12126201), 2022-06-18
Supplement: s1 [file s1]

**Table S1.** COG comparison between S72 and other PAH degrading bacteria retrieved from the IMG database.

| COG list                                                          | Gene abundance |                                     |             | StdErr other | FishersTest Pval | FishersTest adjPval |
|-------------------------------------------------------------------|----------------|-------------------------------------|-------------|--------------|------------------|---------------------|
|                                                                   | S72 (%)        | Mean other_PAH_degrading n =17_ (%) | Differences |              |                  |                     |
| Mobilome: prophages, transposons (X)                              | 2.03           | 0.99                                | 1.05        | 0.14         | 0.00             | 0.00                |
| Amino acid transport and metabolism (E)                           | 6.61           | 8.87                                | -2.26       | 0.38         | 0.00             | 0.00                |
| Secondary metabolites biosynthesis, transport and catabolism (Q)  | 4.52           | 3.20                                | 1.33        | 0.28         | 0.00             | 0.00                |
| Cell motility (N)                                                 | 1.50           | 2.32                                | -0.83       | 0.23         | 0.00             | 0.01                |
| Translation, ribosomal structure and biogenesis (J)               | 4.73           | 6.29                                | -1.56       | 0.40         | 0.01             | 0.03                |
| Carbohydrate transport and metabolism (G)                         | 6.20           | 5.06                                | 1.14        | 0.46         | 0.01             | 0.03                |
| Lipid transport and metabolism (I)                                | 6.99           | 5.85                                | 1.14        | 0.44         | 0.01             | 0.03                |
| Cell wall/membrane/envelope biogenesis (M)                        | 6.58           | 5.76                                | 0.82        | 0.26         | 0.01             | 0.03                |
| Nucleotide transport and metabolism (F)                           | 1.73           | 2.43                                | -0.70       | 0.12         | 0.02             | 0.04                |
| Function unknown (S)                                              | 6.35           | 5.54                                | 0.81        | 0.25         | 0.02             | 0.06                |
| Signal transduction mechanisms (T)                                | 4.65           | 5.48                                | -0.83       | 0.33         | 0.03             | 0.06                |
| Extracellular structures (W)                                      | 0.51           | 0.84                                | -0.33       | 0.11         | 0.07             | 0.13                |
| Replication, recombination and repair (L)                         | 3.33           | 3.07                                | 0.25        | 0.18         | 0.10             | 0.18                |
| Inorganic ion transport and metabolism (P)                        | 6.22           | 5.66                                | 0.57        | 0.17         | 0.14             | 0.22                |
| Transcription (K)                                                 | 7.80           | 7.79                                | 0.01        | 0.46         | 0.21             | 0.29                |
| Posttranslational modification, protein turnover, chaperones (O)  | 4.27           | 4.04                                | 0.23        | 0.17         | 0.21             | 0.29                |
| Intracellular trafficking, secretion, and vesicular transport (U) | 1.65           | 1.97                                | -0.32       | 0.16         | 0.21             | 0.29                |
| Cell cycle control, cell division, chromosome partitioning (D)    | 0.79           | 1.04                                | -0.25       | 0.08         | 0.33             | 0.42                |
| Coenzyme transport and metabolism (H)                             | 4.95           | 5.39                                | -0.44       | 0.14         | 0.35             | 0.42                |
| General function prediction only (R)                              | 9.93           | 9.37                                | 0.57        | 0.32         | 0.47             | 0.54                |

|                                      |      |      |       |      |      |      |
|--------------------------------------|------|------|-------|------|------|------|
| Energy production and conversion (C) | 6.35 | 6.60 | -0.25 | 0.23 | 0.60 | 0.63 |
| Cytoskeleton (Z)                     | 0.03 | 0.03 | 0.00  | 0.01 | 0.61 | 0.63 |
| Defense mechanisms (V)               | 2.26 | 2.34 | -0.08 | 0.12 | 0.90 | 0.90 |
| RNA processing and modification (A)  | 0.00 | 0.02 | -0.02 | 0.00 | 1.00 | 1.00 |
| Chromatin structure and dynamics (B) | 0.03 | 0.05 | -0.02 | 0.01 | 1.00 | 1.00 |

---

**Table S2.** List of genes in *Spingobium yanoikuyae* S72 which is associated with the degradation of S72.

| Locus_tag (GB) | Protein name (GB)                                    | EC NUMBER        | Product (Name en PATRIC)                                    | Pathway Name                                 |
|----------------|------------------------------------------------------|------------------|-------------------------------------------------------------|----------------------------------------------|
| A6768_06750    | acylphosphatase                                      | 3.6.1.7          | Acylphosphate phosphohydrolase, putative                    | 1,4-Dichlorobenzene degradation              |
| A6768_00755    | PQQ-dependent dehydrogenase, methanol/ethanol family | 1.1.2.8          | Quino(hemo)protein alcohol dehydrogenase, PQQ-dependent     | Tetrachloroethene degradation                |
| A6768_08020    | 2-polyprenyl-6-methoxyphenol hydroxylase             | 1.14.13.1        | Salicylate hydroxylase                                      | Biphenyl degradation                         |
| A6768_08130    | alkylhydroperoxidase                                 | 4.1.1.44         | Possible carboxymuconolactone decarboxylase family protein  | Benzoate degradation via hydroxylation       |
| A6768_08245    | NADPH:quinone reductase                              | 1.1.1.-          | Bifunctional protein: zinc-containing alcohol dehydrogenase | Benzoate degradation via hydroxylation       |
| A6768_08265    | aldehyde dehydrogenase                               | 1.2.1.3          | Aldehyde dehydrogenase                                      | Tetrachloroethene degradation                |
| A6768_08275    | aldehyde dehydrogenase                               | 1.2.1.3          | Aldehyde dehydrogenase                                      | Tetrachloroethene degradation                |
| A6768_08290    | alcohol dehydrogenase                                | 1.1.1.1          | Alcohol dehydrogenase                                       | Metabolism of xenobiotics by cytochrome P450 |
| A6768_08315    | alkylhydroperoxidase                                 | 4.1.1.44         | Possible carboxymuconolactone decarboxylase family protein  | Benzoate degradation via hydroxylation       |
| A6768_01095    | glutathione S-transferase                            | 3.3.2.9          | Epoxide hydrolase                                           | Metabolism of xenobiotics by cytochrome P450 |
| A6768_11325    | alpha/beta hydrolase                                 | 1.2.1.3          | Aldehyde dehydrogenase                                      | Tetrachloroethene degradation                |
| A6768_11835    | betaine-aldehyde dehydrogenase                       | 4.2.1.17         | Enoyl-CoA hydratase                                         | Geraniol degradation                         |
| A6768_11870    | enoyl-CoA hydratase                                  | 2.3.1.16;2.3.1.9 | 3-ketoacyl-CoA thiolase, Acetyl-CoA acetyltransferase       | Geraniol degradation                         |
| A6768_11875    | acetyl-CoA C-acyltransferase                         | 4.2.1.17         | Enoyl-CoA hydratase                                         | Geraniol degradation                         |
| A6768_11885    | enoyl-CoA hydratase                                  | 4.1.1.44         | 4-carboxymuconolactone decarboxylase                        | Benzoate degradation via hydroxylation       |
| A6768_12085    | carboxymuconolactone decarboxylase                   | 2.3.1.16;2.3.1.9 | 3-ketoacyl-CoA thiolase , Acetyl-CoA acetyltransferase      | Geraniol degradation                         |
| A6768_12155    | acetyl-CoA C-acyltransferase                         | 3.1.2.-          | Acyl-CoA thioesterase II                                    | Benzoate degradation via hydroxylation       |
| A6768_12180    | acyl-CoA thioesterase II                             | 4.2.1.17         | Enoyl-CoA hydratase                                         | Geraniol degradation                         |
| A6768_12205    | enoyl-CoA hydratase                                  | 3.3.2.9          | Epoxide hydrolase,                                          | Metabolism of xenobiotics by cytochrome P450 |

|             |                                           |                               |                                                                                      |                                              |
|-------------|-------------------------------------------|-------------------------------|--------------------------------------------------------------------------------------|----------------------------------------------|
| A6768_12210 | enterotoxin                               | 4.2.1.17;1.1.1.35;<br>5.1.2.3 | Enoyl-CoA hydratase, 3-hydroxyacyl-CoA dehydrogenase, 3-hydroxybutyryl-CoA epimerase | Geraniol degradation                         |
| A6768_12355 | 3-hydroxyacyl-CoA dehydrogenase           | 4.2.1.17                      | Enoyl-CoA hydratase                                                                  | Geraniol degradation                         |
| A6768_12425 | enoyl-CoA hydratase                       | 2.5.1.18                      | Glutathione S-transferase                                                            | Metabolism of xenobiotics by cytochrome P450 |
| A6768_12460 | hypothetical protein                      | 4.2.1.17                      | Enoyl-CoA hydratase                                                                  | Geraniol degradation                         |
| A6768_12490 | enoyl-CoA hydratase                       | 2.3.1.16;2.3.1.9              | 3-ketoacyl-CoA thiolase, Acetyl-CoA acetyltransferase                                | Geraniol degradation                         |
| A6768_12495 | acetyl-CoA C-acyltransferase              | 2.3.1.16                      | 3-ketoacyl-CoA thiolase                                                              | Geraniol degradation                         |
| A6768_12520 | thiolase                                  | 1.1.1.-                       | Bifunctional protein: zinc-containing alcohol dehydrogenase                          | Benzoate degradation via hydroxylation       |
| A6768_12565 | alcohol dehydrogenase                     | 4.2.1.17                      | Enoyl-CoA hydratase                                                                  | Geraniol degradation                         |
| A6768_12625 | enoyl-CoA hydratase                       | 1.14.13.2                     | P-hydroxybenzoate hydroxylase                                                        | Benzoate degradation via hydroxylation       |
| A6768_12975 | 4-hydroxybenzoate 3-monooxygenase         | 4.1.1.44                      | Carboxymuconolactone decarboxylase                                                   | Benzoate degradation via hydroxylation       |
| A6768_13690 | glutathione S-transferase                 | 3.1.3.1                       | Alkaline phosphatase                                                                 | 1,4-Dichlorobenzene degradation              |
| A6768_19285 | alkylhydroperoxidase                      | 2.5.1.18                      | Glutathione S-transferase                                                            | Metabolism of xenobiotics by cytochrome P450 |
| A6768_04870 | LLM class flavin-dependent oxidoreductase | 1.14.13.-                     | Nitrilotriacetate monooxygenase component A                                          | gamma-Hexachlorocyclohexane degradation      |
| A6768_04895 | nitrilotriacetate monooxygenase           | 1.14.13.-                     | Nitrilotriacetate monooxygenase component A                                          | gamma-Hexachlorocyclohexane degradation      |

---
