# Supplementary material for: Complete Genome Report of a Hydrocarbon-Degrading Sphingobium yanoikuyae S72
Source: MDPI journal article supplement (doi:10.3390/app12126201), 2022-06-18
Supplement: s1 [file s1 › Supplementary figure.pdf]

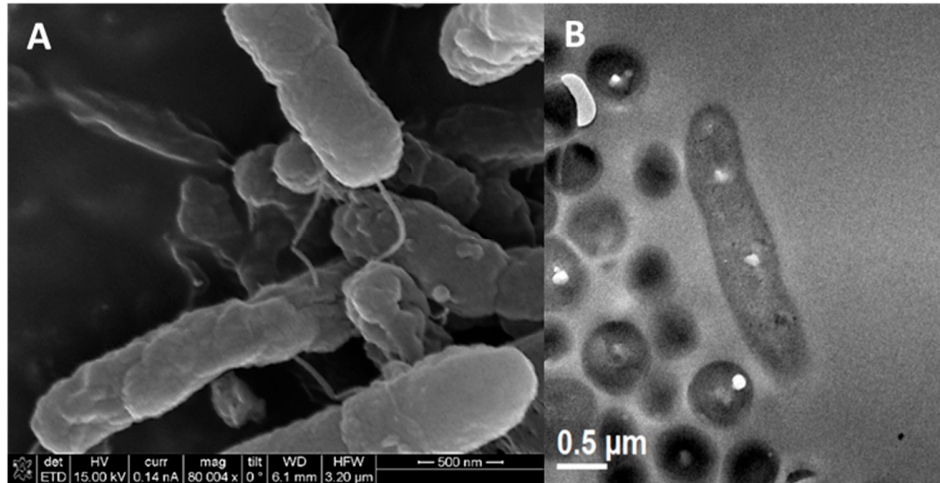

Fig. S1. Morphological features. (A) Scanning electron micrographs of cells *Sphingobium yanoikuyae* strain S72. Scale bar, 500 nm. The presence of a single polar flagellum and a small globular formation is observed. B) Transmission electron micrographs of *S. yanoikuyae* strain S72. Scale bars 0.5  $\mu\text{m}$ .

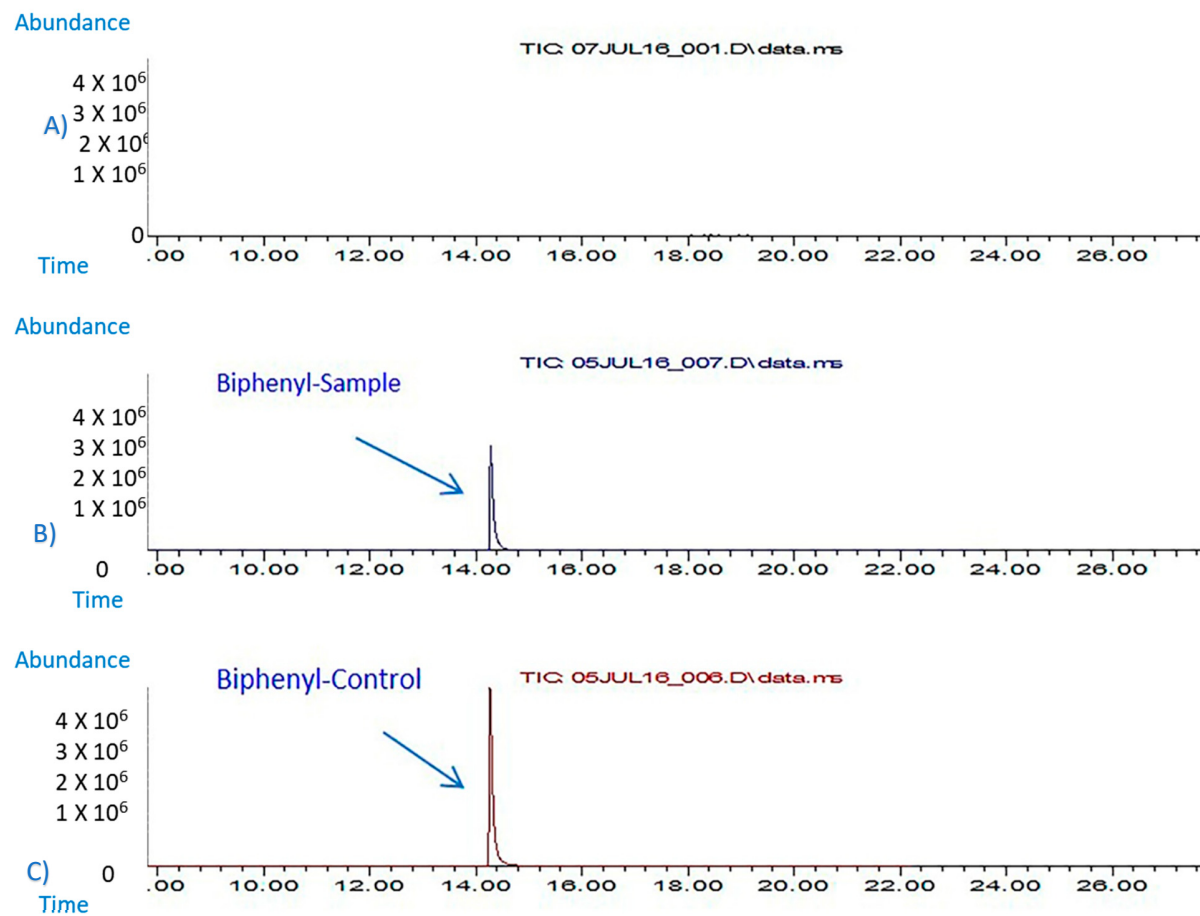

Figure S2: Gas column chromatography image for the degradation of biphenyl by S72- The images showed **a)** culture with *S. yanoikuyae* S72, without biphenyl); **b)** culture with *S. yanoikuyae* S72; **c)** biphenyl and culture without *S. yanoikuyae* S72.

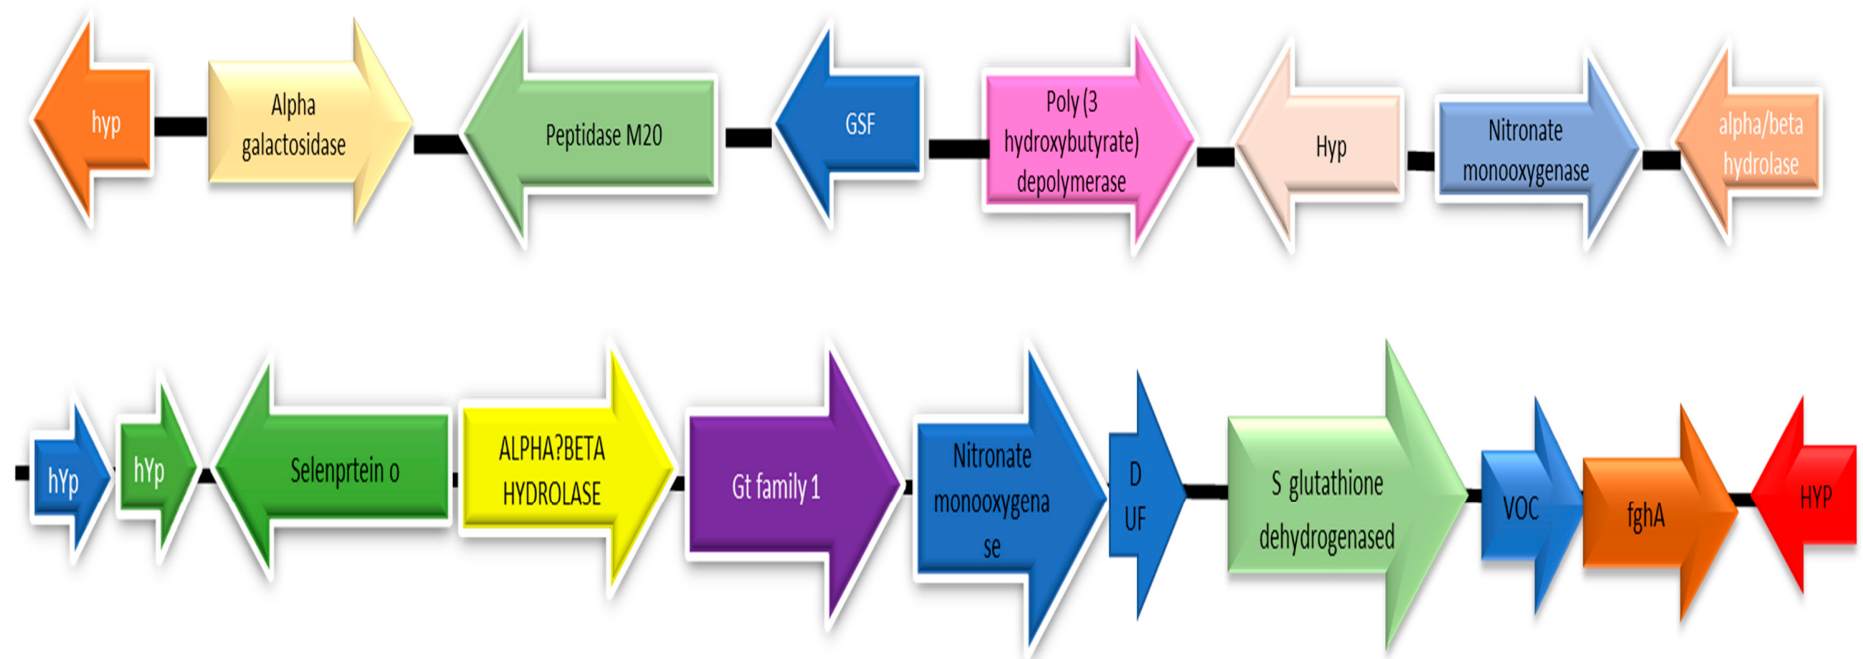

Figure S3: Gene region in *Sphingobium yanoikuyae* S72 that are associated with PAH degradation and showing hypothetical genes that may also be helping in the degradation of PAH.
